# Supplementary material
Source: PubMed Central journal article supplement (PMC6775981)

# Placebo (n=10)

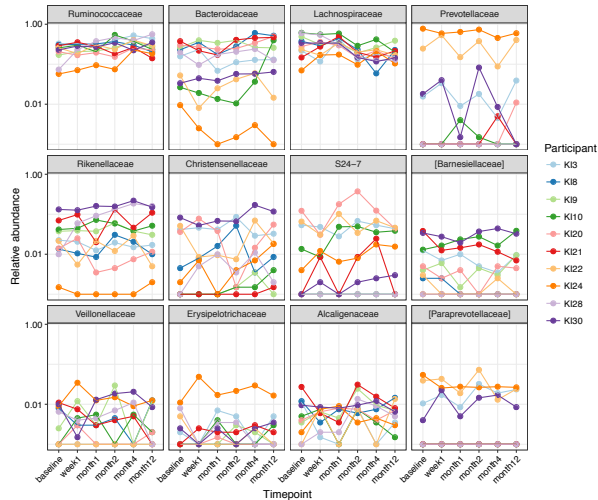

# Clindamycin (n=9)

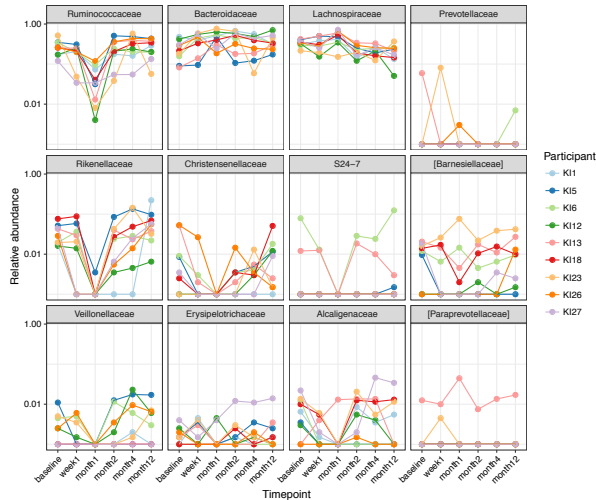

# Ciprofloxacin (n=9)

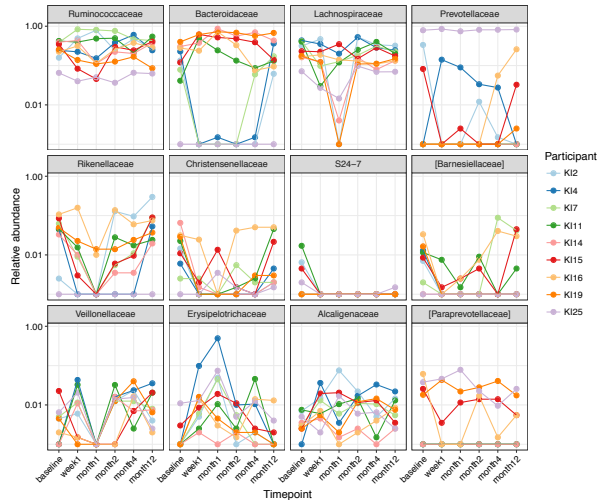

Supplement: 41396_2019_392_MOESM1_ESM.pdf [file 41396_2019_392_MOESM1_ESM.pdf]
