# Supplementary material
Source: PubMed Central journal article supplement (PMC6775981)

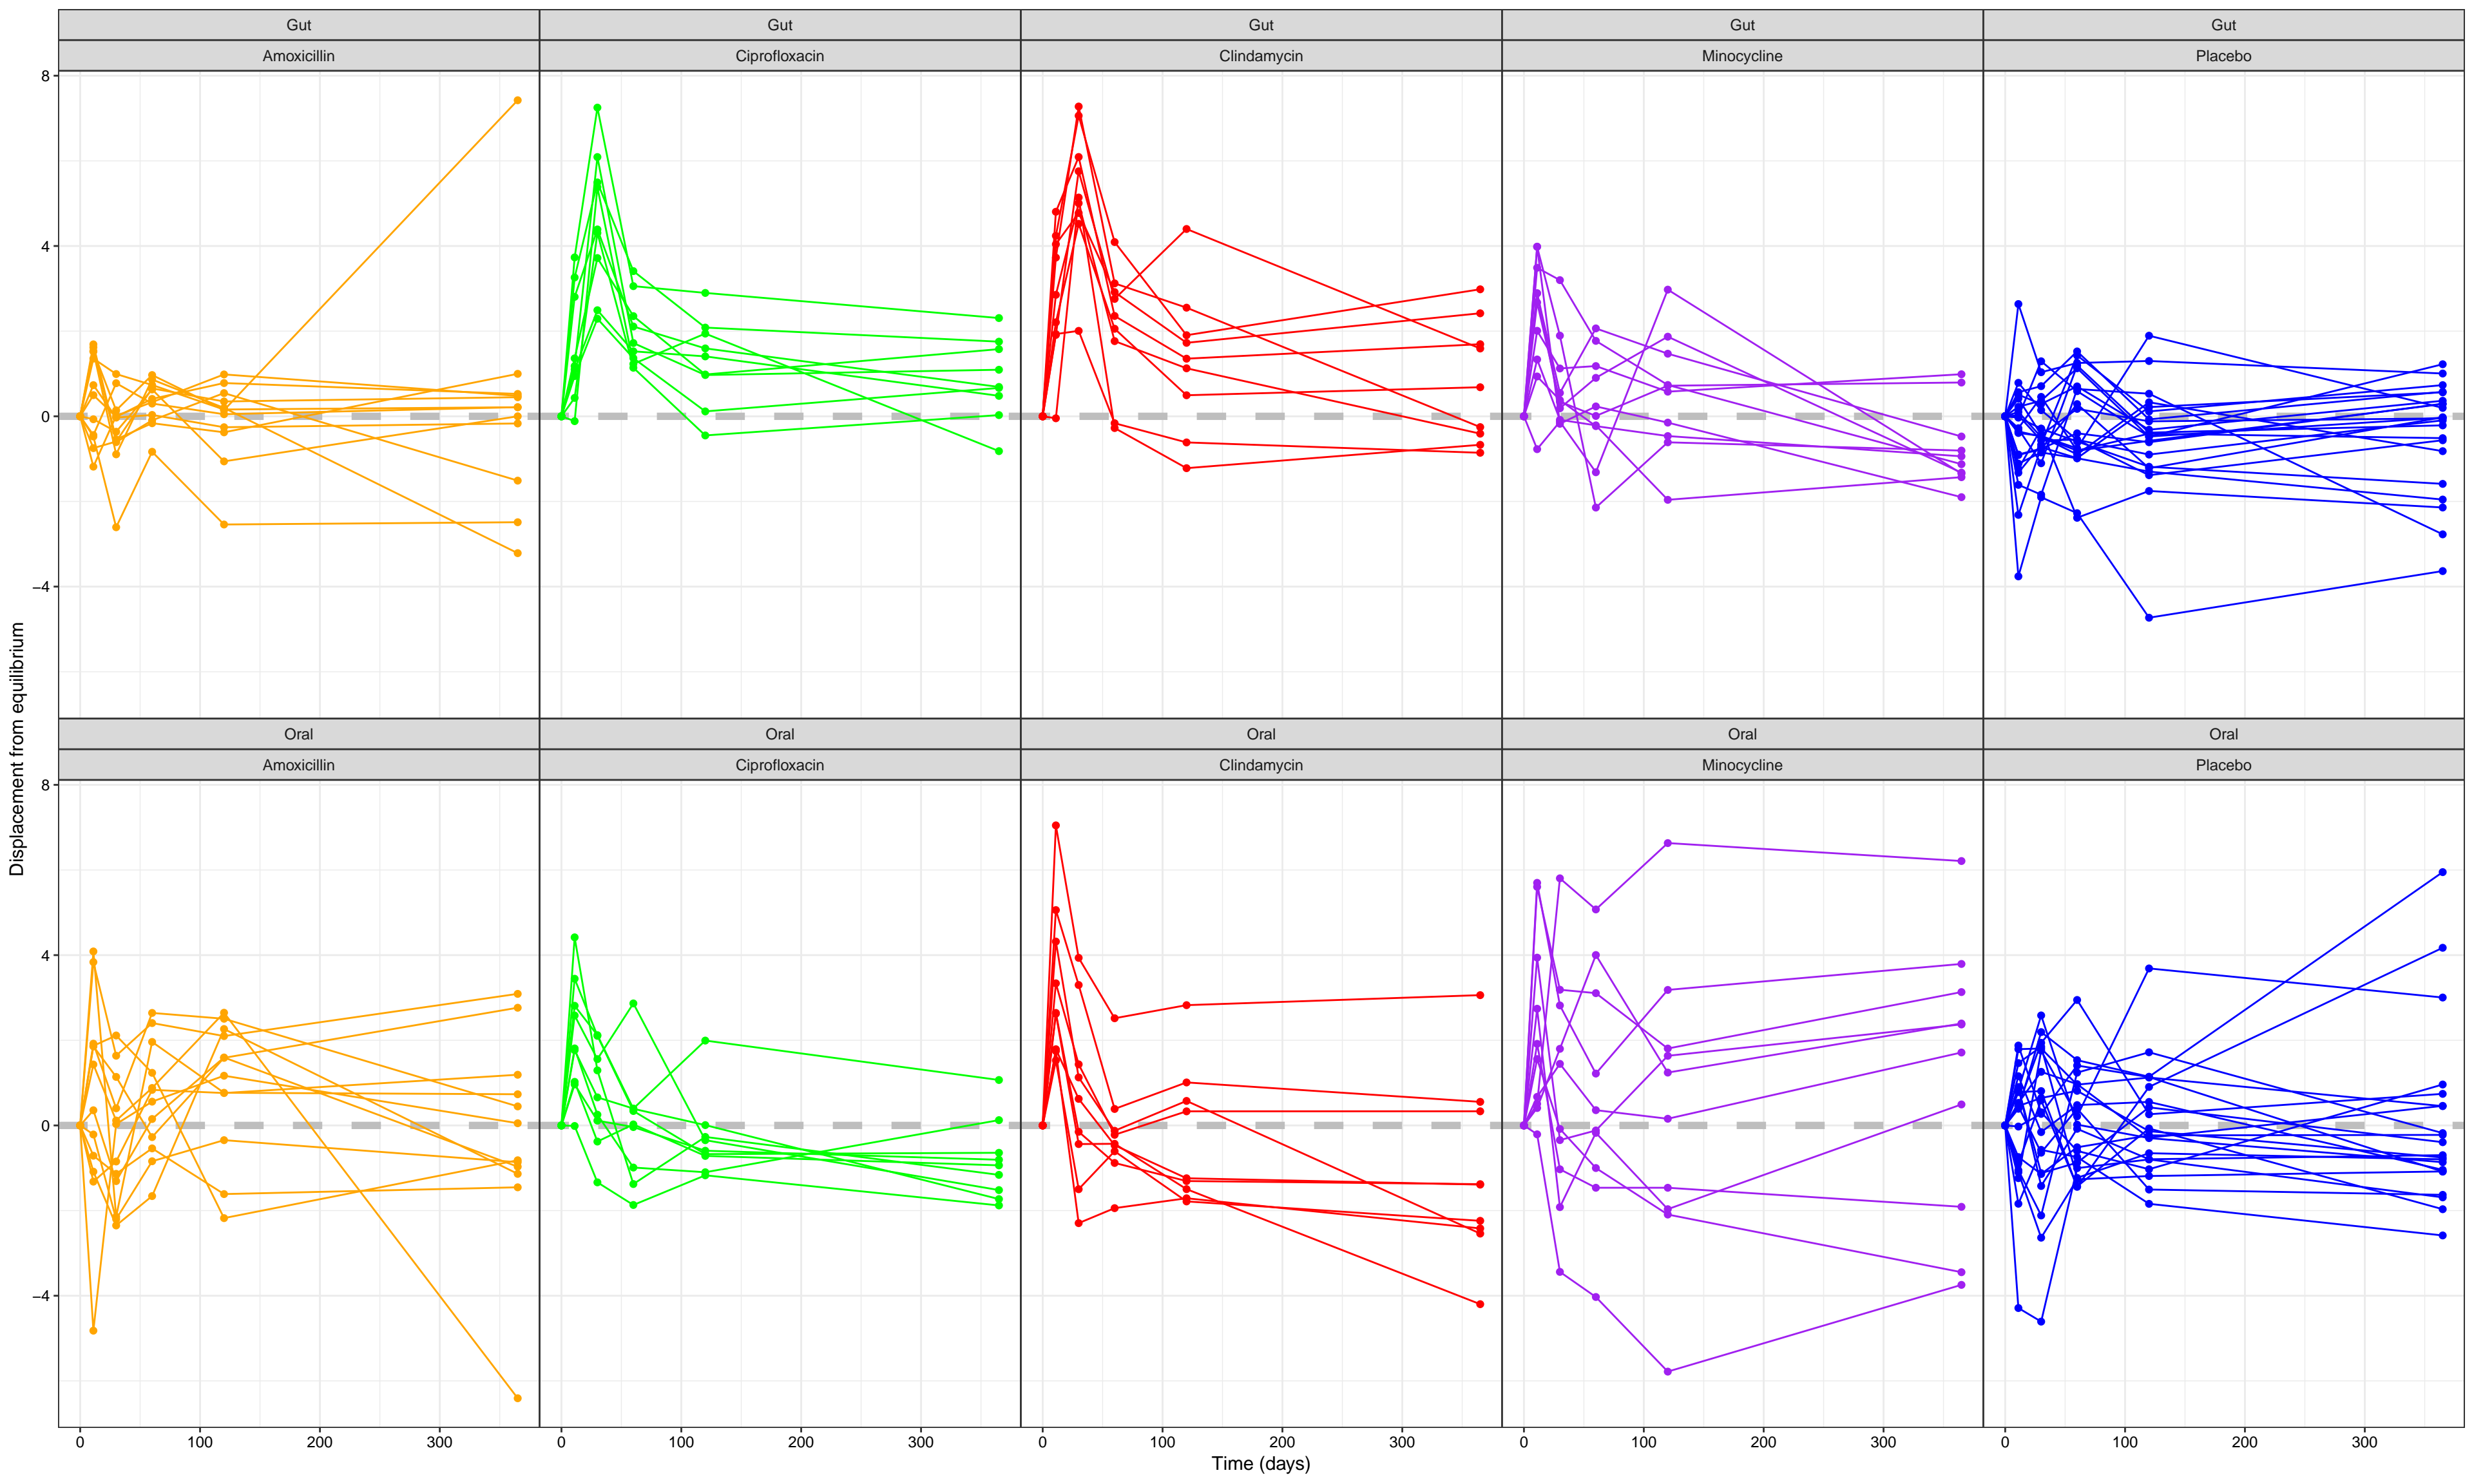

Supplement: 41396_2019_392_MOESM2_ESM.pdf [file 41396_2019_392_MOESM2_ESM.pdf]
