# Supplementary material
Source: PubMed Central journal article supplement (PMC6775981)

Model with return to initial equilibrium

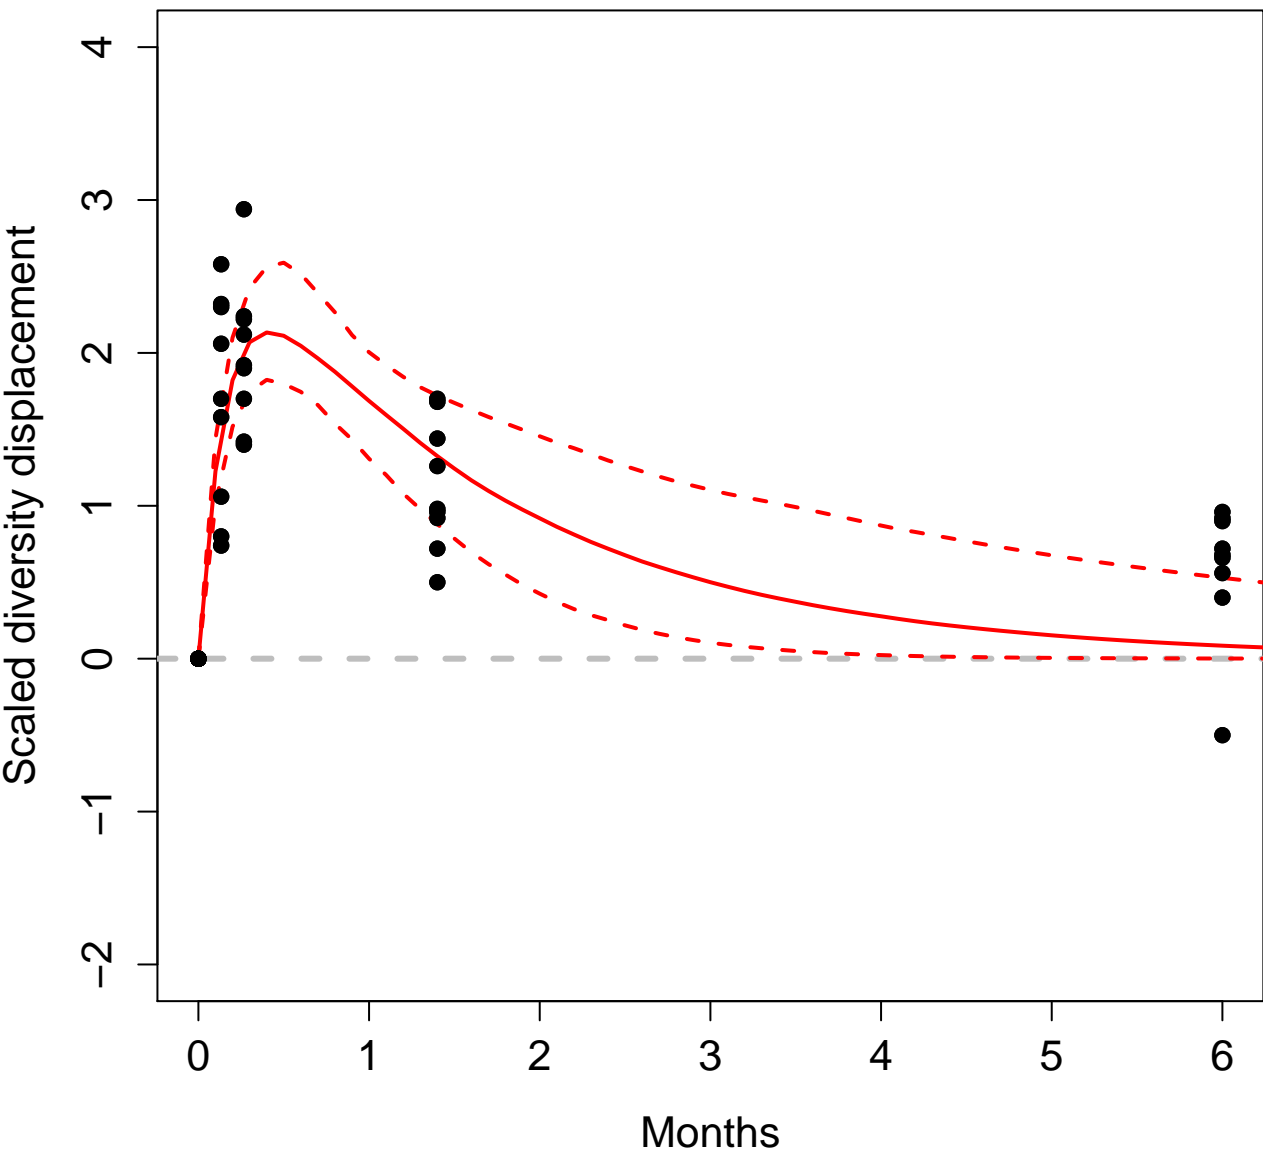

Model with change of equilibrium

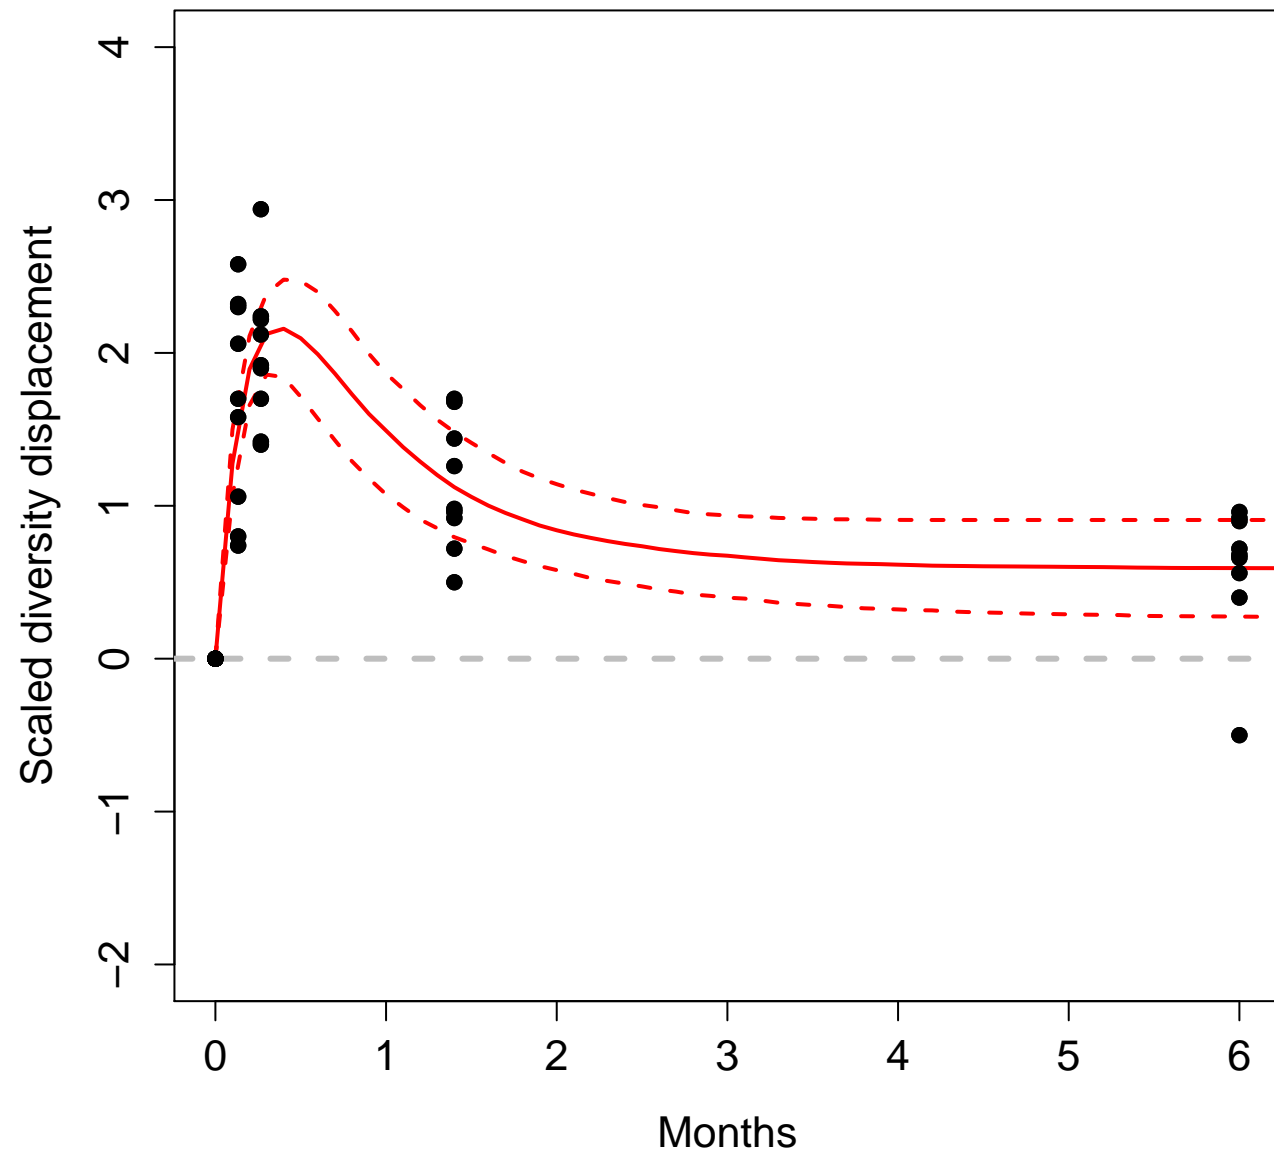

Supplement: 41396_2019_392_MOESM3_ESM.pdf [file 41396_2019_392_MOESM3_ESM.pdf]
